# Supplementary material
Source: PubMed Central journal article supplement (PMC4303455)
Supplement: embr0015-0110-sd2.pdf [file embr0015-0110-sd2.pdf]

Manuscript EMBOR-2013-38041

## **Obesity resistance and deregulation of lipogenesis in 6-fatty acid desaturase (FADS2) deficiency**

Wilhelm Stoffel, Ina Hammels, Britta Jenke, Erika Binczek, Inga Schmidt-Soltau, Susanne Brodesser, Margarete Odenthal and Mario Thevis

*Corresponding author: Wilhelm Stoffel, University of Cologne*

---

### **Review timeline:**

Submission date:

27 September 2013

Accepted:

24 October 2013

---

### **Transaction Report:**

No Peer Review Process File is available with this article, as the authors have chosen not to make the review process public in this case.
